# Supplementary material for: An optimized Al2O3 layer for enhancing the anode performance of NiCo2O4 nanosheets for sodium-ion batteries
Source: Royal Society of Chemistry journal article supplement (doi:10.1039/c7ta01870c), 2017-01-01
Supplement: c7ta01870c1.pdf [file c7ta01870c1.pdf]

## Supplementary Information

### Optimized Al<sub>2</sub>O<sub>3</sub> layer enhancing anode performance of NiCo<sub>2</sub>O<sub>4</sub> nanosheets for sodium ion batteries

Huari Kou<sup>a</sup>, Xifei Li<sup>a,b\*</sup>, Hui Shan<sup>a,b</sup>, Linlin Fan<sup>a,b</sup>, Bo Yan<sup>a,b</sup>, Dejun Li<sup>a</sup>

<sup>a</sup>Tianjin International Joint Research Centre of Surface Technology for Energy Storage Materials, College of Physics and Materials Science, Tianjin Normal University, Tianjin 300387, China. E-mail: [xfli2011@hotmail.com](mailto:xfli2011@hotmail.com); Tel: +86-13502042013

<sup>b</sup>Center for Advanced Energy Materials and Devices, Xi'an University of Technology, Xi'an 710048, China.

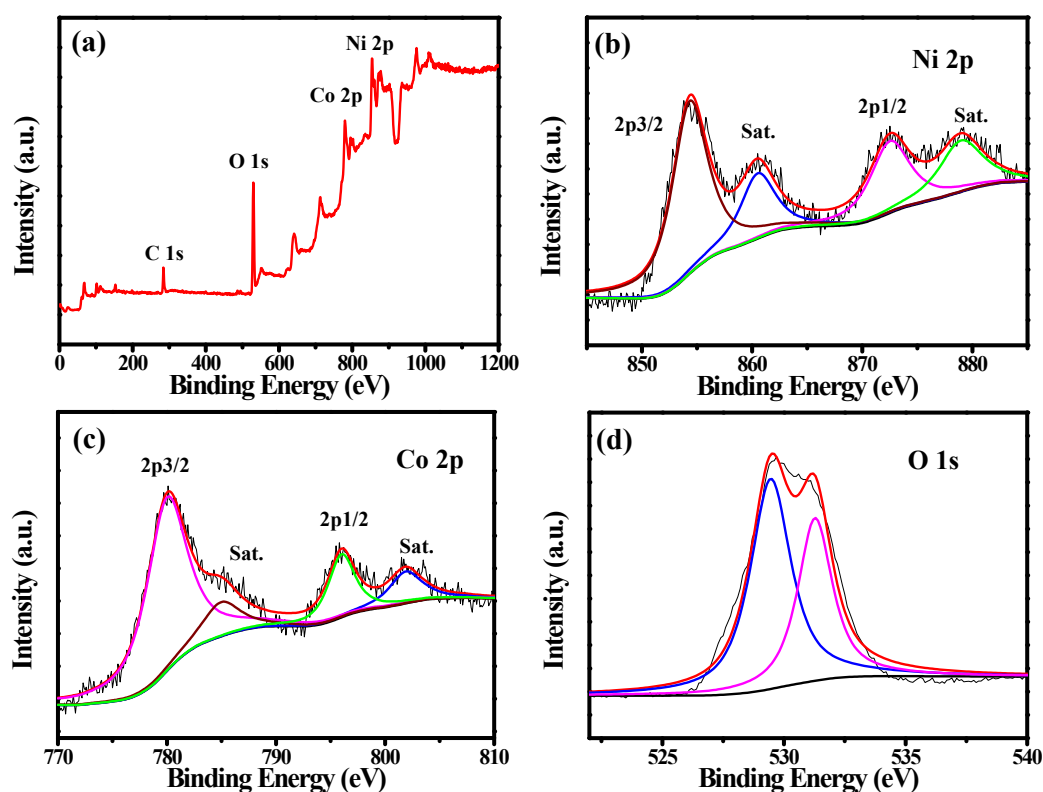

**Fig. S1.** XPS spectra of NiCo<sub>2</sub>O<sub>4</sub>-0c: (a) survey spectrum, (b) Ni<sub>2p</sub>, (c) Co<sub>2p</sub> and (d) O<sub>1s</sub>.

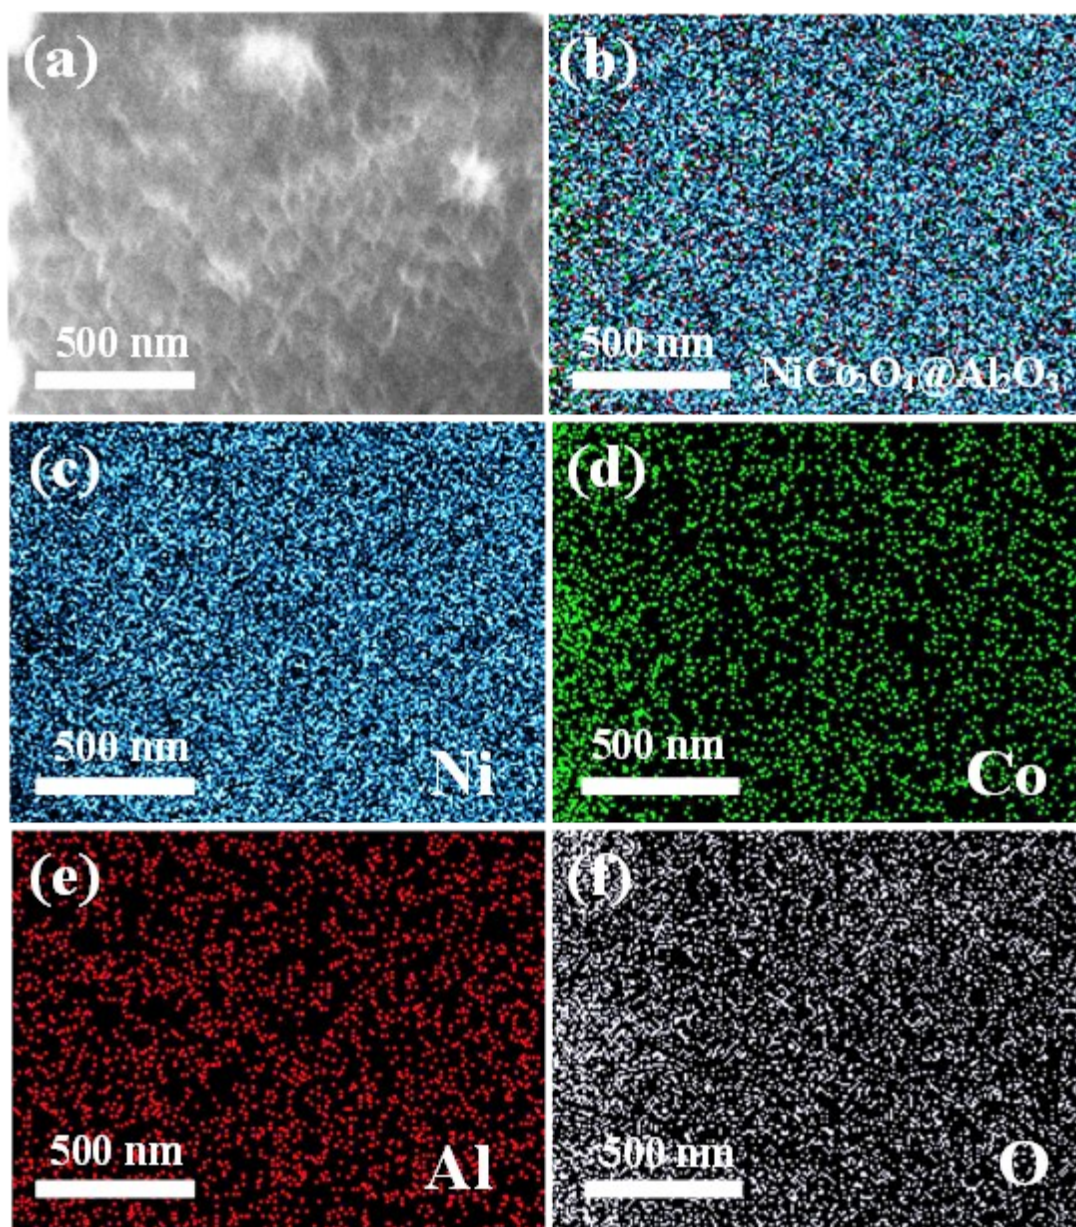

**Fig. S2.** (a) SEM and (b-f) elemental mapping images of NiCo<sub>2</sub>O<sub>4</sub>-50c.

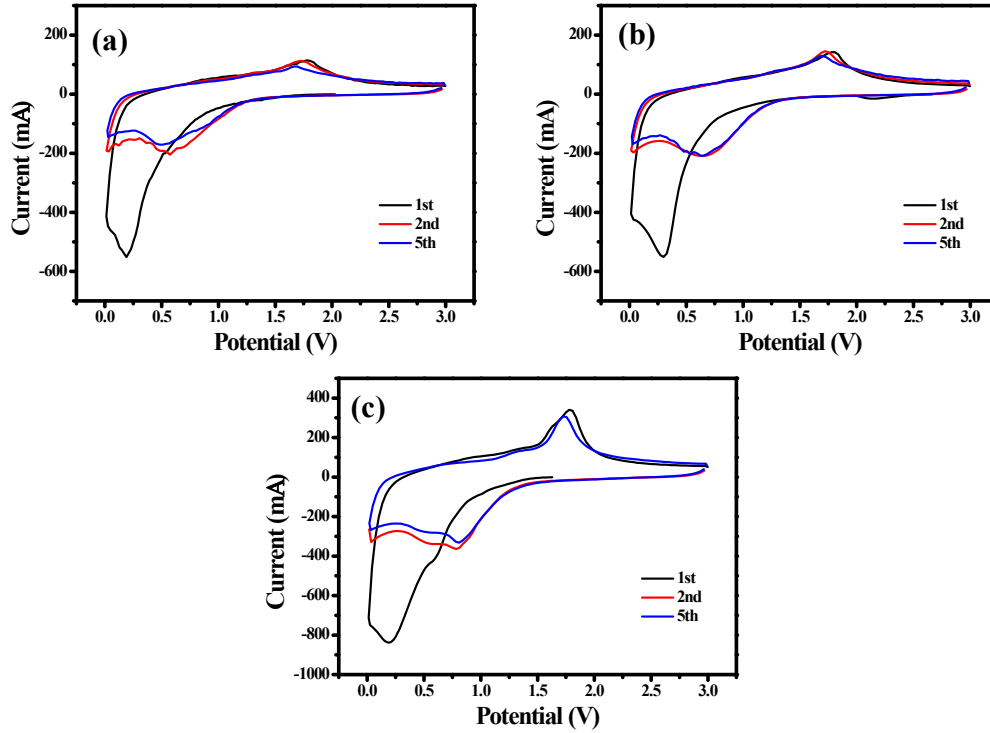

**Fig. S3.** The CV curves of (a) NiCo<sub>2</sub>O<sub>4</sub>-5c, NiCo<sub>2</sub>O<sub>4</sub>-10c and (c) NiCo<sub>2</sub>O<sub>4</sub>-50c in the 1st, 2nd and 5th cycles.

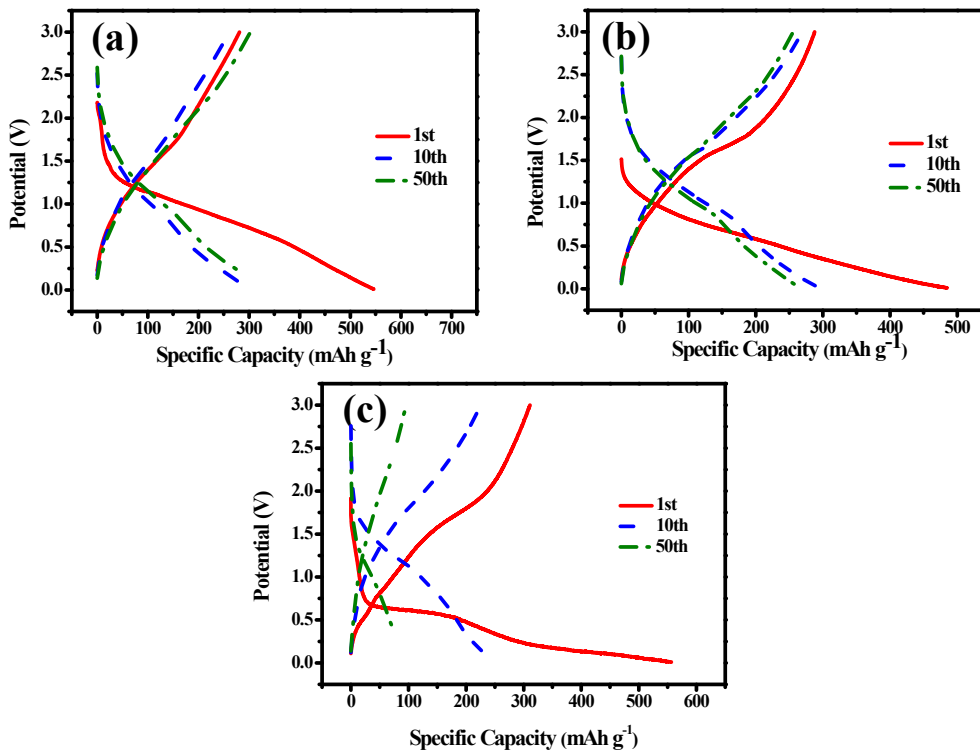

**Fig. S4.** The charge-discharge profiles of (a) NiCo<sub>2</sub>O<sub>4</sub>-5c, (b) NiCo<sub>2</sub>O<sub>4</sub>-10c and (c) NiCo<sub>2</sub>O<sub>4</sub>-50c.
